# Supplementary material
Source: publisher figshare collection journal article supplement (https://acs.figshare.com/ndownloader/files/5163274)
Supplement: Supplementary file 1 [file 5163274]

data_global

#============================================================================
# 1. SUBMISSION DETAILS

_publ_contact_author
;
   Dr. Janusz Lewi\'nski,
   Department of Chemistry
   Warsaw University of Technology
   Noakowskiego 3,
   PL-00-664 Warszawa
   Poland
;

_publ_contact_author_phone        '048 22 6607315'
_publ_contact_author_fax          '048 22 6607279'
_publ_contact_author_email        lewin@ch.pw.edu.pl
_publ_requested_journal           ''

#============================================================================
# 2. TITLE AND AUTHOR LIST

_publ_section_title
;
Simple Generation of Cationic Aluminum Alkyls and Alkoxides Based on the Pendant Arm Tridentate Schiff Base.
;

loop_
 _publ_author_name
 _publ_author_address

'Lewi\'nski, Janusz'
;
   Department of Chemistry
   Warsaw University of Technology
   Noakowskiego 3,
   PL-00-664 Warszawa
   Poland
   e-mail: lewin@ch.pw.edu.pl
;
     'Pawe� Horeglad'
;
   Department of Chemistry
   Warsaw University of Technology
   Noakowskiego 3,
   PL-00-664 Warszawa
   Poland
;
     'Maciej Dranka'
;
   Institute of Physical Chemistry
   Polish Academy of Science
   Kasprzaka 44,
   PL-01-224 Warszawa
   Poland
;
      'Iwona Justyniak'
;
   Institute of Physical Chemistry,
   Polish Academy of Sciences 
   Kasprzaka 44/52,
   PL-01-224 Warszawa
   Poland
;
      'Janusz Lipkowski'
;
   Institute of Physical Chemistry,
   Polish Academy of Sciences 
   Kasprzaka 44/52,
   PL-01-224 Warszawa
   Poland
;

#============================================================================
# 3.  data compound 1
data_comp [(SchNMe2)Al(OPh)(THF)2][BPh4] (8)
 
_audit_creation_method            SHELXL-97
_chemical_name_systematic
;
 ?
;
_chemical_name_common             ?
_chemical_melting_point           ?
_chemical_formula_moiety          ?
_chemical_formula_sum   'C53 H64 Al B N2 O5'
_chemical_formula_weight          846.9
 
loop_
 _atom_type_symbol
 _atom_type_description
 _atom_type_scat_dispersion_real
 _atom_type_scat_dispersion_imag
 _atom_type_scat_source
 'C'  'C'   0.0033   0.0016
 'International Tables Vol C Tables 4.2.6.8 and 6.1.1.4'
 'H'  'H'   0.0000   0.0000
 'International Tables Vol C Tables 4.2.6.8 and 6.1.1.4'
 'O'  'O'   0.0106   0.0060
 'International Tables Vol C Tables 4.2.6.8 and 6.1.1.4'
 'N'  'N'   0.0061   0.0033
 'International Tables Vol C Tables 4.2.6.8 and 6.1.1.4'
 'Al'  'Al'   0.0645   0.0514
 'International Tables Vol C Tables 4.2.6.8 and 6.1.1.4'
 'B'  'B'   0.0013   0.0007
 'International Tables Vol C Tables 4.2.6.8 and 6.1.1.4'
 
_symmetry_cell_setting            triclinic
_symmetry_space_group_name_H-M    'P -1'
_symmetry_space_group_name_H-M     2
 
loop_
 _symmetry_equiv_pos_as_xyz
 'x, y, z'
 '-x, -y, -z'
 
_cell_length_a                    12.2830(2)
_cell_length_b                    12.6830(2)
_cell_length_c                    15.1880(3)
_cell_angle_alpha                 87.6130(10)
_cell_angle_beta                  68.9840(10)
_cell_angle_gamma                 88.8800(10)
_cell_volume                      2206.73(7)
_cell_formula_units_Z             2
_cell_measurement_temperature     150(2)
_cell_measurement_reflns_used     ?
_cell_measurement_theta_min       1.0
_cell_measurement_theta_max       27.48
 
_exptl_crystal_description        'prism'   
_exptl_crystal_colour             'colorless'   
_exptl_crystal_size_max           0.40
_exptl_crystal_size_mid           0.30
_exptl_crystal_size_min           0.25
_exptl_crystal_density_meas       ?
_exptl_crystal_density_diffrn     0.655
_exptl_crystal_density_method     'not measured'
_exptl_crystal_F_000              466
_exptl_absorpt_coefficient_mu     0.050
_exptl_absorpt_correction_type    'semi-empirical'
_exptl_absorpt_correction_T_min   'Scalepak (Otwinowski, Minor, 1997)' 
_exptl_absorpt_correction_T_max   ?
_exptl_absorpt_process_details    ?
 
_exptl_special_details
;
 ?
;
 
_diffrn_ambient_temperature       150(2)
_diffrn_crystal_support           'glass capillary'
_diffrn_radiation_wavelength      0.71073
_diffrn_radiation_type            MoK\a
_diffrn_radiation_source          'fine-focus sealed tube'
_diffrn_radiation_monochromator   graphite
_diffrn_measurement_device        '\k-geometry diffractometr' 
_diffrn_measurement_device_type   'Nonius Kappa-CCD' 
_diffrn_measurement_method        'area detector \f and \w scans' 
_diffrn_detector_area_resol_mean  ?
_diffrn_standards_number          ?
_diffrn_standards_interval_count  ?
_diffrn_standards_interval_time   ?
_diffrn_standards_decay_%         ?
_diffrn_reflns_number             9212
_diffrn_reflns_av_R_equivalents   0.0304
_diffrn_reflns_av_sigmaI/netI     0.0458
_diffrn_reflns_limit_h_min        -12
_diffrn_reflns_limit_h_max        12
_diffrn_reflns_limit_k_min        -12
_diffrn_reflns_limit_k_max        12
_diffrn_reflns_limit_l_min        -15
_diffrn_reflns_limit_l_max        15
_diffrn_reflns_theta_min          2.40
_diffrn_reflns_theta_max          20.82
_reflns_number_total              4622
_reflns_number_gt                 3695
_reflns_threshold_expression      >2sigma(I)
 
_computing_data_collection        'Collect (Nonius B.V. 1998)'  
_computing_cell_refinement        'Denzo & Scalepak (Otwinowski, Minor, 1997)'  
_computing_data_reduction         'Denzo & Scalepak (Otwinowski, Minor, 1997)' 
_computing_structure_solution     'SHELXS-97 (Sheldrick, 1990)' 
_computing_structure_refinement   'SHELXL-97 (Sheldrick, 1997)'
_computing_molecular_graphics   
;
ORTEP III (Burnett, Johnson, 1996) 
;
_computing_publication_material   
;
SHELXL-97 (Sheldrick, 1997) 
;
_refine_special_details
;
 Refinement of F^2^ against ALL reflections.  The weighted R-factor wR and
 goodness of fit S are based on F^2^, conventional R-factors R are based
 on F, with F set to zero for negative F^2^. The threshold expression of
 F^2^ > 2sigma(F^2^) is used only for calculating R-factors(gt) etc. and is
 not relevant to the choice of reflections for refinement.  R-factors based
 on F^2^ are statistically about twice as large as those based on F, and R-
 factors based on ALL data will be even larger.
;
 
_refine_ls_structure_factor_coef  Fsqd
_refine_ls_matrix_type            full
_refine_ls_weighting_scheme       calc
_refine_ls_weighting_details
 'calc w=1/[\s^2^(Fo^2^)+(0.0297P)^2^+1.1564P] where P=(Fo^2^+2Fc^2^)/3'
_atom_sites_solution_primary      direct
_atom_sites_solution_secondary    difmap
_atom_sites_solution_hydrogens    geom
_refine_ls_hydrogen_treatment     mixed
_refine_ls_extinction_method      none
_refine_ls_extinction_coef        ?
_refine_ls_number_reflns          4622
_refine_ls_number_parameters      536
_refine_ls_number_restraints      3
_refine_ls_R_factor_all           0.0649
_refine_ls_R_factor_gt            0.0445
_refine_ls_wR_factor_ref          0.0911
_refine_ls_wR_factor_gt           0.0853
_refine_ls_goodness_of_fit_ref    1.076
_refine_ls_restrained_S_all       1.076
_refine_ls_shift/su_max           0.003
_refine_ls_shift/su_mean          0.000
 
loop_
 _atom_site_label
 _atom_site_type_symbol
 _atom_site_fract_x
 _atom_site_fract_y
 _atom_site_fract_z
 _atom_site_U_iso_or_equiv
 _atom_site_adp_type
 _atom_site_occupancy
 _atom_site_symmetry_multiplicity
 _atom_site_calc_flag
 _atom_site_refinement_flags
 _atom_site_disorder_assembly
 _atom_site_disorder_group
Al1 Al 0.36365(8) 0.72866(6) 0.22550(6) 0.0275(2) Uani 1 1 d . . .
O2 O 0.48250(18) 0.73821(13) 0.11243(12) 0.0281(5) Uani 1 1 d . . .
O3 O 0.39611(17) 0.88315(13) 0.24504(12) 0.0332(5) Uani 1 1 d . . .
O4 O 0.34597(16) 0.57481(13) 0.20301(12) 0.0313(5) Uani 1 1 d . . .
O1 O 0.24526(16) 0.76666(13) 0.19166(12) 0.0317(5) Uani 1 1 d . . .
N1 N 0.4732(2) 0.68270(16) 0.28914(15) 0.0288(6) Uani 1 1 d . . .
N2 N 0.2433(2) 0.71745(17) 0.36645(15) 0.0313(6) Uani 1 1 d . . .
C7 C 0.5946(3) 0.75684(19) 0.09356(19) 0.0273(7) Uani 1 1 d . . .
C38 C 0.2417(3) 0.3353(2) 0.56759(19) 0.0247(7) Uani 1 1 d . . .
C27 C 0.1301(3) 0.0569(2) 0.55408(19) 0.0315(8) Uani 1 1 d . . .
H27 H 0.1128 0.0650 0.4994 0.038 Uiso 1 1 calc R . .
C29 C 0.1025(3) -0.0406(2) 0.6990(2) 0.0346(8) Uani 1 1 d . . .
H29 H 0.0678 -0.0954 0.7419 0.042 Uiso 1 1 calc R . .
C1 C 0.2207(3) 0.8018(2) 0.1168(2) 0.0319(8) Uani 1 1 d . . .
C37 C 0.4583(3) 0.2836(2) 0.3608(2) 0.0303(7) Uani 1 1 d . . .
H37 H 0.4132 0.3305 0.3395 0.036 Uiso 1 1 calc R . .
C45 C 0.1955(2) 0.2556(2) 0.42355(18) 0.0261(7) Uani 1 1 d . . .
C30 C 0.1774(3) 0.0282(2) 0.7165(2) 0.0339(8) Uani 1 1 d . . .
H30 H 0.1945 0.0194 0.7712 0.041 Uiso 1 1 calc R . .
C39 C 0.3215(3) 0.4179(2) 0.55060(19) 0.0281(7) Uani 1 1 d . . .
H39 H 0.3907 0.4145 0.4989 0.034 Uiso 1 1 calc R . .
C13 C 0.5854(3) 0.6907(2) 0.2528(2) 0.0321(8) Uani 1 1 d . . .
H13 H 0.6277 0.6686 0.2902 0.039 Uiso 1 1 calc R . .
C26 C 0.2054(2) 0.1292(2) 0.56893(18) 0.0247(7) Uani 1 1 d . . .
C32 C 0.4017(2) 0.21841(19) 0.44103(18) 0.0251(7) Uani 1 1 d . . .
C12 C 0.6497(3) 0.7309(2) 0.15905(19) 0.0276(7) Uani 1 1 d . . .
C35 C 0.6468(3) 0.2125(2) 0.3411(2) 0.0334(8) Uani 1 1 d . . .
H35 H 0.7272 0.2115 0.3096 0.040 Uiso 1 1 calc R . .
C34 C 0.5951(3) 0.1445(2) 0.4180(2) 0.0310(8) Uani 1 1 d . . .
H34 H 0.6407 0.0961 0.4372 0.037 Uiso 1 1 calc R . .
C31 C 0.2271(2) 0.1104(2) 0.65256(19) 0.0297(7) Uani 1 1 d . . .
H31 H 0.2775 0.1554 0.6659 0.036 Uiso 1 1 calc R . .
C33 C 0.4755(3) 0.1483(2) 0.4663(2) 0.0279(7) Uani 1 1 d . . .
H33 H 0.4430 0.1021 0.5180 0.034 Uiso 1 1 calc R . .
C41 C 0.2007(3) 0.5127(2) 0.6836(2) 0.0409(9) Uani 1 1 d . . .
H41 H 0.1876 0.5707 0.7217 0.049 Uiso 1 1 calc R . .
C46 C 0.1176(2) 0.3377(2) 0.42755(19) 0.0296(7) Uani 1 1 d . . .
H46 H 0.1010 0.3846 0.4762 0.036 Uiso 1 1 calc R . .
C28 C 0.0799(3) -0.0265(2) 0.6166(2) 0.0354(8) Uani 1 1 d . . .
H28 H 0.0309 -0.0730 0.6030 0.042 Uiso 1 1 calc R . .
C40 C 0.3023(3) 0.5046(2) 0.6071(2) 0.0357(8) Uani 1 1 d . . .
H40 H 0.3583 0.5572 0.5931 0.043 Uiso 1 1 calc R . .
B1 B 0.2616(3) 0.2327(2) 0.4999(2) 0.0258(8) Uani 1 1 d . . .
C18 C 0.3841(3) 0.9614(2) 0.1746(2) 0.0416(9) Uani 1 1 d . . .
H18A H 0.3058 0.9907 0.1955 0.050 Uiso 1 1 calc R . .
H18B H 0.3997 0.9289 0.1145 0.050 Uiso 1 1 calc R . .
C42 C 0.1183(3) 0.4343(2) 0.7034(2) 0.0388(8) Uani 1 1 d . . .
H42 H 0.0487 0.4394 0.7547 0.047 Uiso 1 1 calc R . .
C47 C 0.0634(3) 0.3528(2) 0.3618(2) 0.0384(8) Uani 1 1 d . . .
H47 H 0.0112 0.4085 0.3677 0.046 Uiso 1 1 calc R . .
C8 C 0.6619(3) 0.8025(2) 0.0059(2) 0.0348(8) Uani 1 1 d . . .
H8 H 0.6276 0.8195 -0.0384 0.042 Uiso 1 1 calc R . .
C48 C 0.0861(3) 0.2865(2) 0.2882(2) 0.0410(8) Uani 1 1 d . . .
H48 H 0.0503 0.2969 0.2440 0.049 Uiso 1 1 calc R . .
C43 C 0.1397(3) 0.3476(2) 0.6463(2) 0.0338(8) Uani 1 1 d . . .
H43 H 0.0834 0.2952 0.6613 0.041 Uiso 1 1 calc R . .
C49 C 0.1631(3) 0.2041(2) 0.2813(2) 0.0412(8) Uani 1 1 d . . .
H49 H 0.1797 0.1581 0.2320 0.049 Uiso 1 1 calc R . .
C21 C 0.4591(3) 0.9347(2) 0.2963(2) 0.0410(9) Uani 1 1 d . . .
H21A H 0.5000 0.8832 0.3222 0.049 Uiso 1 1 calc R . .
H21B H 0.4062 0.9748 0.3473 0.049 Uiso 1 1 calc R . .
C19 C 0.4726(3) 1.0470(2) 0.1650(2) 0.0399(8) Uani 1 1 d . . .
H19A H 0.4337 1.1128 0.1889 0.048 Uiso 1 1 calc R . .
H19B H 0.5223 1.0587 0.0995 0.048 Uiso 1 1 calc R . .
C11 C 0.7690(3) 0.7499(2) 0.1343(2) 0.0415(8) Uani 1 1 d . . .
H11 H 0.8056 0.7313 0.1768 0.050 Uiso 1 1 calc R . .
C50 C 0.2156(3) 0.1896(2) 0.3474(2) 0.0348(8) Uani 1 1 d . . .
H50 H 0.2669 0.1331 0.3412 0.042 Uiso 1 1 calc R . .
C15 C 0.3113(3) 0.7137(2) 0.4304(2) 0.0380(8) Uani 1 1 d . . .
H15A H 0.2638 0.6843 0.4919 0.046 Uiso 1 1 calc R . .
H15B H 0.3338 0.7845 0.4385 0.046 Uiso 1 1 calc R . .
C16 C 0.1703(3) 0.6206(2) 0.3855(2) 0.0428(8) Uani 1 1 d . . .
H16A H 0.2197 0.5593 0.3747 0.064 Uiso 1 1 calc R . .
H16B H 0.1267 0.6215 0.3441 0.064 Uiso 1 1 calc R . .
H16C H 0.1174 0.6188 0.4499 0.064 Uiso 1 1 calc R . .
C20 C 0.5435(3) 1.0061(2) 0.2235(2) 0.0445(9) Uani 1 1 d . . .
H20A H 0.6119 0.9675 0.1853 0.053 Uiso 1 1 calc R . .
H20B H 0.5676 1.0634 0.2527 0.053 Uiso 1 1 calc R . .
C36 C 0.5773(3) 0.2817(2) 0.3121(2) 0.0336(8) Uani 1 1 d . . .
H36 H 0.6104 0.3269 0.2598 0.040 Uiso 1 1 calc R . .
C23 C 0.3197(3) 0.4561(2) 0.0968(2) 0.0488(9) Uani 1 1 d . . .
H23A H 0.3575 0.4917 0.0359 0.059 Uiso 1 1 calc R . .
H23B H 0.2675 0.4027 0.0909 0.059 Uiso 1 1 calc R . .
C9 C 0.7776(3) 0.8223(3) -0.0150(2) 0.0491(9) Uani 1 1 d . . .
H9 H 0.8206 0.8544 -0.0730 0.059 Uiso 1 1 calc R . .
C22 C 0.2565(3) 0.5326(2) 0.1706(2) 0.0421(8) Uani 1 1 d . . .
H22A H 0.2216 0.5888 0.1442 0.051 Uiso 1 1 calc R . .
H22B H 0.1956 0.4973 0.2224 0.051 Uiso 1 1 calc R . .
C25 C 0.4461(3) 0.5022(2) 0.1759(2) 0.0420(8) Uani 1 1 d . . .
H25A H 0.4655 0.4802 0.2305 0.050 Uiso 1 1 calc R . .
H25B H 0.5138 0.5358 0.1292 0.050 Uiso 1 1 calc R . .
C2 C 0.2850(3) 0.7746(2) 0.0255(2) 0.0412(8) Uani 1 1 d . . .
H2 H 0.3497 0.7306 0.0141 0.049 Uiso 1 1 calc R . .
C14 C 0.4185(3) 0.6465(2) 0.38832(19) 0.0390(8) Uani 1 1 d . . .
H14A H 0.4718 0.6546 0.4217 0.047 Uiso 1 1 calc R . .
H14B H 0.3974 0.5726 0.3924 0.047 Uiso 1 1 calc R . .
C3 C 0.2537(3) 0.8126(3) -0.0499(2) 0.0525(10) Uani 1 1 d . . .
H3 H 0.2966 0.7929 -0.1110 0.063 Uiso 1 1 calc R . .
C6 C 0.1249(3) 0.8689(2) 0.1320(2) 0.0407(8) Uani 1 1 d . . .
H6 H 0.0804 0.8881 0.1930 0.049 Uiso 1 1 calc R . .
C4 C 0.1593(3) 0.8792(3) -0.0336(3) 0.0532(10) Uani 1 1 d . . .
H4 H 0.1385 0.9053 -0.0835 0.064 Uiso 1 1 calc R . .
C17 C 0.1599(3) 0.8082(2) 0.3929(2) 0.0443(9) Uani 1 1 d . . .
H17A H 0.1111 0.8002 0.4582 0.066 Uiso 1 1 calc R . .
H17B H 0.1123 0.8099 0.3547 0.066 Uiso 1 1 calc R . .
H17C H 0.2027 0.8729 0.3828 0.066 Uiso 1 1 calc R . .
C5 C 0.0962(3) 0.9066(3) 0.0571(3) 0.0527(10) Uani 1 1 d . . .
H5 H 0.0325 0.9518 0.0680 0.063 Uiso 1 1 calc R . .
C24 C 0.4082(3) 0.4088(2) 0.1354(2) 0.0548(10) Uani 1 1 d . . .
H24A H 0.4736 0.3784 0.0857 0.066 Uiso 1 1 calc R . .
H24B H 0.3731 0.3547 0.1840 0.066 Uiso 1 1 calc R . .
C10 C 0.8324(3) 0.7956(3) 0.0485(2) 0.0548(10) Uani 1 1 d . . .
H10 H 0.9115 0.8086 0.0327 0.066 Uiso 1 1 calc R . .
O61 O 0.9531(7) 0.5325(6) 0.9236(5) 0.117(2) Uiso 0.50 1 d P A -1
C61 C 1.0486(12) 0.5944(10) 0.9277(9) 0.131(4) Uiso 0.50 1 d PD A -1
H61A H 1.0213 0.6612 0.9568 0.158 Uiso 0.50 1 calc PR A -1
H61B H 1.1067 0.6075 0.8654 0.158 Uiso 0.50 1 calc PR A -1
C62 C 1.0969(13) 0.5238(11) 0.9885(10) 0.176(7) Uiso 0.50 1 d PD A -1
H62A H 1.1620 0.4824 0.9491 0.211 Uiso 0.50 1 calc PR A -1
H62B H 1.1237 0.5661 1.0284 0.211 Uiso 0.50 1 calc PR A -1
C63 C 0.9986(12) 0.4517(13) 1.0486(8) 0.161(7) Uiso 0.50 1 d PD A -1
H63A H 0.9447 0.4863 1.1030 0.194 Uiso 0.50 1 calc PR A -1
H63B H 1.0270 0.3865 1.0685 0.194 Uiso 0.50 1 calc PR A -1
C64 C 0.9469(8) 0.4355(6) 0.9731(6) 0.072(2) Uiso 0.50 1 d PD A -1
H64A H 0.9907 0.3820 0.9305 0.086 Uiso 0.50 1 calc PR A -1
H64B H 0.8665 0.4128 1.0018 0.086 Uiso 0.50 1 calc PR A -1
 
loop_
 _atom_site_aniso_label
 _atom_site_aniso_U_11
 _atom_site_aniso_U_22
 _atom_site_aniso_U_33
 _atom_site_aniso_U_23
 _atom_site_aniso_U_13
 _atom_site_aniso_U_12
Al1 0.0311(6) 0.0255(5) 0.0285(5) 0.0002(4) -0.0140(5) 0.0015(4)
O2 0.0297(14) 0.0305(11) 0.0272(11) 0.0025(8) -0.0142(10) -0.0013(9)
O3 0.0451(14) 0.0277(11) 0.0362(12) 0.0007(9) -0.0262(11) -0.0019(9)
O4 0.0287(13) 0.0294(11) 0.0342(12) -0.0028(9) -0.0090(10) 0.0004(10)
O1 0.0347(13) 0.0354(11) 0.0282(12) -0.0018(9) -0.0154(10) 0.0051(9)
N1 0.0303(19) 0.0291(13) 0.0268(15) 0.0048(10) -0.0104(14) -0.0016(12)
N2 0.0316(16) 0.0329(14) 0.0308(15) -0.0043(11) -0.0129(13) 0.0028(12)
C7 0.035(2) 0.0189(15) 0.0295(19) -0.0014(13) -0.0128(18) -0.0033(14)
C38 0.028(2) 0.0262(16) 0.0256(18) 0.0029(13) -0.0176(17) 0.0048(14)
C27 0.035(2) 0.0331(18) 0.0303(18) -0.0010(15) -0.0162(16) 0.0030(15)
C29 0.030(2) 0.0302(17) 0.038(2) 0.0069(14) -0.0059(17) 0.0007(15)
C1 0.033(2) 0.0312(17) 0.036(2) -0.0009(15) -0.0171(18) -0.0037(15)
C37 0.032(2) 0.0270(17) 0.0341(19) -0.0009(14) -0.0144(17) 0.0038(14)
C45 0.0260(19) 0.0267(16) 0.0244(17) 0.0060(13) -0.0081(15) -0.0066(14)
C30 0.034(2) 0.0381(18) 0.0317(19) 0.0024(15) -0.0151(16) 0.0028(16)
C39 0.037(2) 0.0256(17) 0.0264(17) 0.0030(14) -0.0170(15) 0.0012(15)
C13 0.036(2) 0.0328(17) 0.034(2) 0.0013(14) -0.0201(18) 0.0028(15)
C26 0.0222(18) 0.0253(16) 0.0282(18) -0.0036(13) -0.0108(15) 0.0047(13)
C32 0.033(2) 0.0188(15) 0.0285(18) -0.0034(13) -0.0166(16) -0.0004(14)
C12 0.028(2) 0.0318(17) 0.0246(18) -0.0004(13) -0.0114(16) -0.0009(14)
C35 0.026(2) 0.0301(17) 0.042(2) -0.0117(16) -0.0088(17) -0.0024(16)
C34 0.030(2) 0.0284(17) 0.040(2) -0.0094(15) -0.0191(18) 0.0064(14)
C31 0.030(2) 0.0293(17) 0.0317(18) -0.0009(14) -0.0141(16) -0.0010(14)
C33 0.030(2) 0.0252(16) 0.0312(18) -0.0040(13) -0.0140(17) 0.0002(14)
C41 0.058(3) 0.0285(19) 0.045(2) -0.0106(15) -0.028(2) 0.0085(18)
C46 0.028(2) 0.0314(18) 0.0300(18) 0.0060(13) -0.0122(16) -0.0015(15)
C28 0.034(2) 0.0314(18) 0.040(2) 0.0006(15) -0.0129(17) -0.0065(15)
C40 0.047(2) 0.0255(18) 0.041(2) 0.0005(15) -0.024(2) -0.0003(15)
B1 0.024(2) 0.0290(19) 0.027(2) -0.0005(15) -0.0118(18) 0.0018(15)
C18 0.062(3) 0.0269(17) 0.047(2) 0.0050(14) -0.0339(19) 0.0023(16)
C42 0.037(2) 0.042(2) 0.0367(19) -0.0065(16) -0.0120(17) 0.0116(17)
C47 0.034(2) 0.0406(19) 0.043(2) 0.0148(16) -0.0193(18) -0.0027(15)
C8 0.038(2) 0.0399(18) 0.029(2) 0.0033(15) -0.0144(17) -0.0106(16)
C48 0.045(2) 0.052(2) 0.035(2) 0.0149(17) -0.0260(18) -0.0144(18)
C43 0.032(2) 0.0331(18) 0.038(2) -0.0019(15) -0.0146(18) 0.0023(14)
C49 0.050(2) 0.047(2) 0.032(2) 0.0009(15) -0.0211(18) -0.0076(18)
C21 0.065(3) 0.0306(17) 0.044(2) -0.0041(15) -0.040(2) -0.0014(17)
C19 0.048(2) 0.0334(18) 0.041(2) 0.0018(14) -0.0199(18) -0.0052(16)
C11 0.033(2) 0.061(2) 0.033(2) 0.0013(16) -0.0166(18) -0.0024(17)
C50 0.036(2) 0.0372(18) 0.0357(19) -0.0001(15) -0.0191(17) 0.0021(15)
C15 0.042(2) 0.0480(19) 0.0243(18) 0.0011(14) -0.0130(17) -0.0017(17)
C16 0.038(2) 0.047(2) 0.036(2) -0.0036(15) -0.0044(17) -0.0076(16)
C20 0.059(2) 0.0326(18) 0.056(2) -0.0044(16) -0.037(2) -0.0084(17)
C36 0.035(2) 0.0277(18) 0.0349(19) -0.0016(14) -0.0082(18) -0.0054(15)
C23 0.058(3) 0.0399(19) 0.043(2) -0.0097(16) -0.0105(19) -0.0095(18)
C9 0.049(3) 0.068(2) 0.028(2) 0.0065(16) -0.0102(19) -0.0266(19)
C22 0.042(2) 0.0372(18) 0.048(2) -0.0043(16) -0.0167(18) -0.0092(16)
C25 0.042(2) 0.0285(18) 0.051(2) -0.0011(15) -0.0114(18) 0.0059(16)
C2 0.037(2) 0.054(2) 0.035(2) -0.0022(16) -0.0163(19) 0.0024(16)
C14 0.037(2) 0.050(2) 0.0294(19) 0.0110(15) -0.0130(17) -0.0004(17)
C3 0.046(3) 0.074(3) 0.035(2) 0.0069(18) -0.0118(19) -0.018(2)
C6 0.041(2) 0.0450(19) 0.044(2) 0.0000(16) -0.0254(19) 0.0011(17)
C4 0.052(3) 0.068(2) 0.049(3) 0.0263(19) -0.032(2) -0.015(2)
C17 0.043(2) 0.049(2) 0.040(2) -0.0126(15) -0.0125(18) 0.0147(17)
C5 0.046(3) 0.053(2) 0.070(3) 0.007(2) -0.034(2) 0.0006(18)
C24 0.058(3) 0.0326(19) 0.068(2) -0.0105(17) -0.014(2) 0.0027(17)
C10 0.036(2) 0.088(3) 0.042(2) -0.0003(19) -0.014(2) -0.022(2)
 
_geom_special_details
;
 All esds (except the esd in the dihedral angle between two l.s. planes)
 are estimated using the full covariance matrix.  The cell esds are taken
 into account individually in the estimation of esds in distances, angles
 and torsion angles; correlations between esds in cell parameters are only
 used when they are defined by crystal symmetry.  An approximate (isotropic)
 treatment of cell esds is used for estimating esds involving l.s. planes.
;
 
loop_
 _geom_bond_atom_site_label_1
 _geom_bond_atom_site_label_2
 _geom_bond_distance
 _geom_bond_site_symmetry_2
 _geom_bond_publ_flag
Al1 O1 1.760(2) . ?
Al1 O2 1.813(2) . ?
Al1 N1 1.985(2) . ?
Al1 O4 2.0241(18) . ?
Al1 O3 2.0616(18) . ?
Al1 N2 2.122(2) . ?
O2 C7 1.326(3) . ?
O3 C21 1.458(3) . ?
O3 C18 1.473(3) . ?
O4 C25 1.468(3) . ?
O4 C22 1.473(3) . ?
O1 C1 1.334(3) . ?
N1 C13 1.292(3) . ?
N1 C14 1.470(3) . ?
N2 C15 1.490(3) . ?
N2 C16 1.491(3) . ?
N2 C17 1.495(3) . ?
C7 C8 1.398(4) . ?
C7 C12 1.415(4) . ?
C38 C43 1.400(4) . ?
C38 C39 1.400(4) . ?
C38 B1 1.652(4) . ?
C27 C28 1.387(4) . ?
C27 C26 1.395(4) . ?
C29 C28 1.379(4) . ?
C29 C30 1.380(4) . ?
C1 C2 1.382(4) . ?
C1 C6 1.395(4) . ?
C37 C36 1.382(4) . ?
C37 C32 1.408(4) . ?
C45 C46 1.390(4) . ?
C45 C50 1.402(4) . ?
C45 B1 1.650(4) . ?
C30 C31 1.384(4) . ?
C39 C40 1.387(4) . ?
C13 C12 1.435(4) . ?
C26 C31 1.399(4) . ?
C26 B1 1.644(4) . ?
C32 C33 1.396(4) . ?
C32 B1 1.641(4) . ?
C12 C11 1.400(4) . ?
C35 C36 1.380(4) . ?
C35 C34 1.384(4) . ?
C34 C33 1.388(4) . ?
C41 C40 1.372(4) . ?
C41 C42 1.379(4) . ?
C46 C47 1.391(4) . ?
C18 C19 1.517(4) . ?
C42 C43 1.391(4) . ?
C47 C48 1.371(4) . ?
C8 C9 1.367(4) . ?
C48 C49 1.377(4) . ?
C49 C50 1.379(4) . ?
C21 C20 1.499(4) . ?
C19 C20 1.522(4) . ?
C11 C10 1.366(4) . ?
C15 C14 1.506(4) . ?
C23 C22 1.496(4) . ?
C23 C24 1.512(4) . ?
C9 C10 1.388(4) . ?
C25 C24 1.513(4) . ?
C2 C3 1.397(4) . ?
C3 C4 1.375(5) . ?
C6 C5 1.373(4) . ?
C4 C5 1.372(5) . ?
O61 C64 1.403(9) . ?
O61 C61 1.446(15) . ?
C61 C62 1.519(2) . ?
C62 C63 1.519(2) . ?
C63 C64 1.520(2) . ?
 
loop_
 _geom_angle_atom_site_label_1
 _geom_angle_atom_site_label_2
 _geom_angle_atom_site_label_3
 _geom_angle
 _geom_angle_site_symmetry_1
 _geom_angle_site_symmetry_3
 _geom_angle_publ_flag
O1 Al1 O2 100.51(9) . . ?
O1 Al1 N1 168.60(10) . . ?
O2 Al1 N1 90.89(10) . . ?
O1 Al1 O4 92.29(8) . . ?
O2 Al1 O4 88.91(8) . . ?
N1 Al1 O4 87.77(9) . . ?
O1 Al1 O3 91.65(8) . . ?
O2 Al1 O3 87.89(8) . . ?
N1 Al1 O3 88.86(8) . . ?
O4 Al1 O3 175.32(9) . . ?
O1 Al1 N2 87.35(9) . . ?
O2 Al1 N2 171.81(10) . . ?
N1 Al1 N2 81.27(10) . . ?
O4 Al1 N2 93.12(8) . . ?
O3 Al1 N2 89.59(8) . . ?
C7 O2 Al1 129.37(17) . . ?
C21 O3 C18 106.79(19) . . ?
C21 O3 Al1 134.86(16) . . ?
C18 O3 Al1 115.89(15) . . ?
C25 O4 C22 108.3(2) . . ?
C25 O4 Al1 121.54(16) . . ?
C22 O4 Al1 125.14(16) . . ?
C1 O1 Al1 141.48(19) . . ?
C13 N1 C14 119.1(2) . . ?
C13 N1 Al1 125.19(19) . . ?
C14 N1 Al1 115.5(2) . . ?
C15 N2 C16 108.5(2) . . ?
C15 N2 C17 108.1(2) . . ?
C16 N2 C17 106.0(2) . . ?
C15 N2 Al1 107.81(17) . . ?
C16 N2 Al1 112.37(16) . . ?
C17 N2 Al1 113.83(17) . . ?
O2 C7 C8 119.5(3) . . ?
O2 C7 C12 122.2(3) . . ?
C8 C7 C12 118.3(3) . . ?
C43 C38 C39 114.4(2) . . ?
C43 C38 B1 121.6(2) . . ?
C39 C38 B1 124.0(3) . . ?
C28 C27 C26 123.4(3) . . ?
C28 C29 C30 118.8(3) . . ?
O1 C1 C2 123.3(3) . . ?
O1 C1 C6 118.0(3) . . ?
C2 C1 C6 118.6(3) . . ?
C36 C37 C32 123.5(3) . . ?
C46 C45 C50 114.5(2) . . ?
C46 C45 B1 125.1(2) . . ?
C50 C45 B1 120.4(2) . . ?
C29 C30 C31 120.0(3) . . ?
C40 C39 C38 123.3(3) . . ?
N1 C13 C12 125.0(3) . . ?
C27 C26 C31 114.3(2) . . ?
C27 C26 B1 125.2(2) . . ?
C31 C26 B1 120.4(2) . . ?
C33 C32 C37 114.4(3) . . ?
C33 C32 B1 125.2(2) . . ?
C37 C32 B1 120.3(2) . . ?
C11 C12 C7 119.6(3) . . ?
C11 C12 C13 118.5(3) . . ?
C7 C12 C13 121.8(3) . . ?
C36 C35 C34 119.0(3) . . ?
C35 C34 C33 120.2(3) . . ?
C30 C31 C26 123.4(3) . . ?
C34 C33 C32 123.0(3) . . ?
C40 C41 C42 119.4(3) . . ?
C45 C46 C47 122.7(3) . . ?
C29 C28 C27 120.0(3) . . ?
C41 C40 C39 120.0(3) . . ?
C32 B1 C26 112.2(2) . . ?
C32 B1 C45 108.5(2) . . ?
C26 B1 C45 110.8(2) . . ?
C32 B1 C38 108.8(2) . . ?
C26 B1 C38 107.5(2) . . ?
C45 B1 C38 109.0(2) . . ?
O3 C18 C19 106.3(2) . . ?
C41 C42 C43 119.6(3) . . ?
C48 C47 C46 120.7(3) . . ?
C9 C8 C7 120.5(3) . . ?
C47 C48 C49 118.5(3) . . ?
C42 C43 C38 123.3(3) . . ?
C48 C49 C50 120.1(3) . . ?
O3 C21 C20 104.4(2) . . ?
C18 C19 C20 105.2(2) . . ?
C10 C11 C12 120.8(3) . . ?
C49 C50 C45 123.4(3) . . ?
N2 C15 C14 109.2(2) . . ?
C21 C20 C19 102.7(3) . . ?
C35 C36 C37 119.8(3) . . ?
C22 C23 C24 102.0(3) . . ?
C8 C9 C10 121.4(3) . . ?
O4 C22 C23 105.2(2) . . ?
O4 C25 C24 105.4(2) . . ?
C1 C2 C3 120.6(3) . . ?
N1 C14 C15 106.6(2) . . ?
C4 C3 C2 119.9(3) . . ?
C5 C6 C1 120.0(3) . . ?
C5 C4 C3 119.4(3) . . ?
C4 C5 C6 121.5(3) . . ?
C23 C24 C25 103.3(2) . . ?
C11 C10 C9 119.4(3) . . ?
C64 O61 C61 110.2(8) . . ?
O61 C61 C62 102.3(11) . . ?
C63 C62 C61 107.2(12) . . ?
C62 C63 C64 96.1(9) . . ?
O61 C64 C63 107.3(9) . . ?
 
loop_
 _geom_torsion_atom_site_label_1
 _geom_torsion_atom_site_label_2
 _geom_torsion_atom_site_label_3
 _geom_torsion_atom_site_label_4
 _geom_torsion
 _geom_torsion_site_symmetry_1
 _geom_torsion_site_symmetry_2
 _geom_torsion_site_symmetry_3
 _geom_torsion_site_symmetry_4
 _geom_torsion_publ_flag
O1 Al1 O2 C7 152.9(2) . . . . ?
N1 Al1 O2 C7 -27.2(2) . . . . ?
O4 Al1 O2 C7 -114.9(2) . . . . ?
O3 Al1 O2 C7 61.7(2) . . . . ?
N2 Al1 O2 C7 -10.5(7) . . . . ?
O1 Al1 O3 C21 160.7(2) . . . . ?
O2 Al1 O3 C21 -98.9(3) . . . . ?
N1 Al1 O3 C21 -7.9(3) . . . . ?
O4 Al1 O3 C21 -52.0(11) . . . . ?
N2 Al1 O3 C21 73.4(3) . . . . ?
O1 Al1 O3 C18 -39.9(2) . . . . ?
O2 Al1 O3 C18 60.5(2) . . . . ?
N1 Al1 O3 C18 151.5(2) . . . . ?
O4 Al1 O3 C18 107.4(10) . . . . ?
N2 Al1 O3 C18 -127.27(19) . . . . ?
O1 Al1 O4 C25 151.32(19) . . . . ?
O2 Al1 O4 C25 50.85(19) . . . . ?
N1 Al1 O4 C25 -40.1(2) . . . . ?
O3 Al1 O4 C25 4.0(11) . . . . ?
N2 Al1 O4 C25 -121.21(19) . . . . ?
O1 Al1 O4 C22 -0.5(2) . . . . ?
O2 Al1 O4 C22 -101.0(2) . . . . ?
N1 Al1 O4 C22 168.1(2) . . . . ?
O3 Al1 O4 C22 -147.8(10) . . . . ?
N2 Al1 O4 C22 86.9(2) . . . . ?
O2 Al1 O1 C1 -4.5(3) . . . . ?
N1 Al1 O1 C1 176.1(4) . . . . ?
O4 Al1 O1 C1 -93.8(3) . . . . ?
O3 Al1 O1 C1 83.7(3) . . . . ?
N2 Al1 O1 C1 173.2(3) . . . . ?
O1 Al1 N1 C13 -165.9(4) . . . . ?
O2 Al1 N1 C13 14.7(2) . . . . ?
O4 Al1 N1 C13 103.6(2) . . . . ?
O3 Al1 N1 C13 -73.2(2) . . . . ?
N2 Al1 N1 C13 -162.9(2) . . . . ?
O1 Al1 N1 C14 8.2(6) . . . . ?
O2 Al1 N1 C14 -171.27(18) . . . . ?
O4 Al1 N1 C14 -82.40(19) . . . . ?
O3 Al1 N1 C14 100.86(18) . . . . ?
N2 Al1 N1 C14 11.10(18) . . . . ?
O1 Al1 N2 C15 -164.56(17) . . . . ?
O2 Al1 N2 C15 -0.9(7) . . . . ?
N1 Al1 N2 C15 16.02(16) . . . . ?
O4 Al1 N2 C15 103.29(17) . . . . ?
O3 Al1 N2 C15 -72.89(17) . . . . ?
O1 Al1 N2 C16 75.88(19) . . . . ?
O2 Al1 N2 C16 -120.4(6) . . . . ?
N1 Al1 N2 C16 -103.54(19) . . . . ?
O4 Al1 N2 C16 -16.28(19) . . . . ?
O3 Al1 N2 C16 167.55(19) . . . . ?
O1 Al1 N2 C17 -44.68(19) . . . . ?
O2 Al1 N2 C17 119.0(6) . . . . ?
N1 Al1 N2 C17 135.90(19) . . . . ?
O4 Al1 N2 C17 -136.83(19) . . . . ?
O3 Al1 N2 C17 46.99(19) . . . . ?
Al1 O2 C7 C8 -154.16(19) . . . . ?
Al1 O2 C7 C12 26.6(3) . . . . ?
Al1 O1 C1 C2 32.2(4) . . . . ?
Al1 O1 C1 C6 -148.2(2) . . . . ?
C28 C29 C30 C31 0.9(4) . . . . ?
C43 C38 C39 C40 0.5(4) . . . . ?
B1 C38 C39 C40 178.6(2) . . . . ?
C14 N1 C13 C12 -176.0(2) . . . . ?
Al1 N1 C13 C12 -2.2(4) . . . . ?
C28 C27 C26 C31 0.4(4) . . . . ?
C28 C27 C26 B1 -176.6(3) . . . . ?
C36 C37 C32 C33 -1.9(4) . . . . ?
C36 C37 C32 B1 174.9(2) . . . . ?
O2 C7 C12 C11 178.4(2) . . . . ?
C8 C7 C12 C11 -0.9(4) . . . . ?
O2 C7 C12 C13 -5.1(4) . . . . ?
C8 C7 C12 C13 175.6(2) . . . . ?
N1 C13 C12 C11 170.4(3) . . . . ?
N1 C13 C12 C7 -6.2(4) . . . . ?
C36 C35 C34 C33 -1.8(4) . . . . ?
C29 C30 C31 C26 0.3(4) . . . . ?
C27 C26 C31 C30 -0.9(4) . . . . ?
B1 C26 C31 C30 176.3(3) . . . . ?
C35 C34 C33 C32 0.4(4) . . . . ?
C37 C32 C33 C34 1.3(4) . . . . ?
B1 C32 C33 C34 -175.2(2) . . . . ?
C50 C45 C46 C47 0.4(4) . . . . ?
B1 C45 C46 C47 -179.4(3) . . . . ?
C30 C29 C28 C27 -1.4(4) . . . . ?
C26 C27 C28 C29 0.7(4) . . . . ?
C42 C41 C40 C39 -0.1(4) . . . . ?
C38 C39 C40 C41 -0.5(4) . . . . ?
C33 C32 B1 C26 -21.0(3) . . . . ?
C37 C32 B1 C26 162.6(2) . . . . ?
C33 C32 B1 C45 -143.7(2) . . . . ?
C37 C32 B1 C45 39.9(3) . . . . ?
C33 C32 B1 C38 97.8(3) . . . . ?
C37 C32 B1 C38 -78.6(3) . . . . ?
C27 C26 B1 C32 -108.8(3) . . . . ?
C31 C26 B1 C32 74.3(3) . . . . ?
C27 C26 B1 C45 12.6(4) . . . . ?
C31 C26 B1 C45 -164.3(2) . . . . ?
C27 C26 B1 C38 131.6(3) . . . . ?
C31 C26 B1 C38 -45.3(3) . . . . ?
C46 C45 B1 C32 -129.8(3) . . . . ?
C50 C45 B1 C32 50.5(3) . . . . ?
C46 C45 B1 C26 106.7(3) . . . . ?
C50 C45 B1 C26 -73.1(3) . . . . ?
C46 C45 B1 C38 -11.5(4) . . . . ?
C50 C45 B1 C38 168.8(2) . . . . ?
C43 C38 B1 C32 -159.3(2) . . . . ?
C39 C38 B1 C32 22.8(3) . . . . ?
C43 C38 B1 C26 -37.6(3) . . . . ?
C39 C38 B1 C26 144.5(2) . . . . ?
C43 C38 B1 C45 82.6(3) . . . . ?
C39 C38 B1 C45 -95.3(3) . . . . ?
C21 O3 C18 C19 17.2(3) . . . . ?
Al1 O3 C18 C19 -147.66(19) . . . . ?
C40 C41 C42 C43 0.7(4) . . . . ?
C45 C46 C47 C48 -0.7(4) . . . . ?
O2 C7 C8 C9 -180.0(3) . . . . ?
C12 C7 C8 C9 -0.7(4) . . . . ?
C46 C47 C48 C49 0.5(4) . . . . ?
C41 C42 C43 C38 -0.7(4) . . . . ?
C39 C38 C43 C42 0.1(4) . . . . ?
B1 C38 C43 C42 -178.0(3) . . . . ?
C47 C48 C49 C50 0.0(4) . . . . ?
C18 O3 C21 C20 -35.0(3) . . . . ?
Al1 O3 C21 C20 125.7(2) . . . . ?
O3 C18 C19 C20 6.8(3) . . . . ?
C7 C12 C11 C10 1.6(4) . . . . ?
C13 C12 C11 C10 -175.1(3) . . . . ?
C48 C49 C50 C45 -0.3(5) . . . . ?
C46 C45 C50 C49 0.1(4) . . . . ?
B1 C45 C50 C49 179.9(3) . . . . ?
C16 N2 C15 C14 82.5(3) . . . . ?
C17 N2 C15 C14 -163.0(2) . . . . ?
Al1 N2 C15 C14 -39.5(3) . . . . ?
O3 C21 C20 C19 38.2(3) . . . . ?
C18 C19 C20 C21 -27.3(3) . . . . ?
C34 C35 C36 C37 1.3(4) . . . . ?
C32 C37 C36 C35 0.6(4) . . . . ?
C7 C8 C9 C10 1.7(5) . . . . ?
C25 O4 C22 C23 -18.8(3) . . . . ?
Al1 O4 C22 C23 136.1(2) . . . . ?
C24 C23 C22 O4 35.8(3) . . . . ?
C22 O4 C25 C24 -6.0(3) . . . . ?
Al1 O4 C25 C24 -161.99(18) . . . . ?
O1 C1 C2 C3 178.9(3) . . . . ?
C6 C1 C2 C3 -0.7(4) . . . . ?
C13 N1 C14 C15 139.1(3) . . . . ?
Al1 N1 C14 C15 -35.3(3) . . . . ?
N2 C15 C14 N1 48.3(3) . . . . ?
C1 C2 C3 C4 1.1(5) . . . . ?
O1 C1 C6 C5 -179.7(3) . . . . ?
C2 C1 C6 C5 -0.1(4) . . . . ?
C2 C3 C4 C5 -0.7(5) . . . . ?
C3 C4 C5 C6 -0.2(5) . . . . ?
C1 C6 C5 C4 0.6(5) . . . . ?
C22 C23 C24 C25 -39.0(3) . . . . ?
O4 C25 C24 C23 28.1(3) . . . . ?
C12 C11 C10 C9 -0.6(5) . . . . ?
C8 C9 C10 C11 -1.0(5) . . . . ?
C64 O61 C61 C62 -1.7(13) . . . . ?
O61 C61 C62 C63 -24.2(15) . . . . ?
C61 C62 C63 C64 37.7(14) . . . . ?
C61 O61 C64 C63 27.0(11) . . . . ?
C62 C63 C64 O61 -38.9(12) . . . . ?
 
_diffrn_measured_fraction_theta_max    0.997
_diffrn_reflns_theta_full              20.82
_diffrn_measured_fraction_theta_full   0.997
_refine_diff_density_max    0.250
_refine_diff_density_min   -0.259
_refine_diff_density_rms    0.033
